# Supplementary material for: Profiles of Sterigmatocystin and Its Metabolites during Traditional Chinese Rice Wine Processing
Source: MDPI journal article supplement (doi:10.3390/bios12040212), 2022-04-01
Supplement: s1 [file s1]

# Profiles of Sterigmatocystin and Its Metabolites during Traditional Chinese Rice Wine Processing

Jia Zhang <sup>1,2,3</sup>, Liwei Xu <sup>1,2,3</sup>, Xinxin Xu <sup>1,2,3</sup>, Xiaoling Wu <sup>1,2,3,\*</sup>, Hua Kuang <sup>1,2,3</sup> and Chuanlai Xu <sup>1,2,3,\*</sup>

<sup>1</sup> State Key Laboratory of Food Science and Technology, Jiangnan University, Wuxi 214122, China; 7200112107@stu.jiangnan.edu.cn (J.Z.); 7170112080@stu.jiangnan.edu.cn (L.X.); xuxinxin@jiangnan.edu.cn (X.X.); kuangh@jiangnan.edu.cn (H.K.)

<sup>2</sup> International Joint Research Laboratory for Biointerface and Biodetection and School of Food Science and Technology, Jiangnan University, Wuxi 214122, China

<sup>3</sup> Collaborative Innovation center of Food Safety and Quality Control in Jiangsu Province, Jiangnan University, Wuxi 214122, China

\* Correspondence: wuxiaoling@jiangnan.edu.cn (X.W.); xcl@jiangnan.edu.cn (C.X.); Tel./Fax: +86-510-85329077 (X.W.; C.X.)

## 1. Chemicals and reagents

Analytical standard sterigmatocystin (STG) was purchased from Dr. Ehrenstorfer GmbH (Augsburg, Germany). The standard stock solution (1 mg/mL) for STG was dissolved in acetonitrile and a working standard solution was diluted into a standard solution of 10 mg/L. All solutions were stored at -20 °C until use. The HPLC-grade acetonitrile/Methanol and HPLC-grade formic acid used for sample extraction were obtained from ANPEL Laboratory Technologies (Shanghai, China). Analytical-grade anhydrous magnesium sulfate (MgSO<sub>4</sub>) and sodium chloride (NaCl) were purchased from Beijing Chemical and Reagent (Beijing, China). Ultra-pure water was used in all experiments (<18 MU cm resistivity). Primary secondary amine (PSA, 40–63 µm) was obtained from ANPEL Laboratory Technologies (Shanghai, China). LC-MS grade acetonitrile and formic acid were acquired from ANPEL Laboratory Technologies (Shanghai, China).

## 2. Sample preparation

### 2.1. Extraction and purification of STG in rice, steamed rice, fermented rice and wine samples

A total of 5 g of each sample was homogenized and weighed into a 50 mL PTFE centrifuge tube, extracted with 2.5 mL of water (fermented wine and steamed rice samples extracted with 0 and 10 mL of water, respectively) and 10 mL of acetonitrile for 2 min using a Vortex Genie 2T (SI, USA) at 1,200 strokes/min. Then, NaCl (2g) and anhydrous MgSO<sub>4</sub> (2g) (steamed rice added with 6g NaCl and anhydrous 6g MgSO<sub>4</sub>) were added and vortexed for 1 min. Samples were then centrifuged for 5 min at 5,000 rpm, and then 1 mL of the supernatant was transferred into a 2 mL centrifuge tube containing 20 mg of PSA sorbents and 150 mg of anhydrous MgSO<sub>4</sub>. Next, the sample was vortexed vigorously for 30 s and then centrifuged at 12,000 rpm for 1 min. The supernatant was then filtered with a 0.22 µm filter prior to LC-MS/MS.

### 2.2. Sample preparation for the non-targeted metabonomic analysis of rice wine

Samples were prepared in accordance with a previously described method but with some modifications (Magnuson et al., 2020; Xu et al., 2020). In brief, 200 milligrams of each rice wine sample were homogenized (20 µL of internal standard of DL-2-chlorophenylalanine, 500.0 mg/L) with 800 µL of water (except for fermented wine samples) in 5 mL centrifuge tube, and then 3.2 mL of methanol/ACN (1:1, v/v) was added. The samples were vortexed for 30 s and then extracted ultrasonically for 5 min. The samples were then vortexed for 30 s and centrifuged at 12,000 rpm at 4 °C for 15 min. The supernatants were evaporated to dryness at 4 °C, reconstituted with 200 µL of methanol/ACN/H<sub>2</sub>O (4:4:2,

v/v/v), and then vortexed and centrifuged, as described above. Then, 120  $\mu$ L of supernatant was analyzed by UPLC-HRMS (high resolution mass spectrometer). Quality control (QC) samples were prepared with 20  $\mu$ L of each sample.

Magnuson, J. T., Giroux, M., Cryder, Z., Gan, J., & Schlenk, D. (2020). The use of non-targeted metabolomics to assess the toxicity of bifenthrin to juvenile chinook salmon (*oncorhynchus tshawytscha*). *Aquatic toxicology*, 224, 105518.

Xu, L. W., Guo, L. L., Wang, Z. X., Wu, X. L., Kuang, H., Xu, C. L., et al. (2020). Profiling and identification of biocatalyzed transformation of sulfoxaflor in vivo. *Angewandte Chemie International Edition*, 59, 16218–16224.

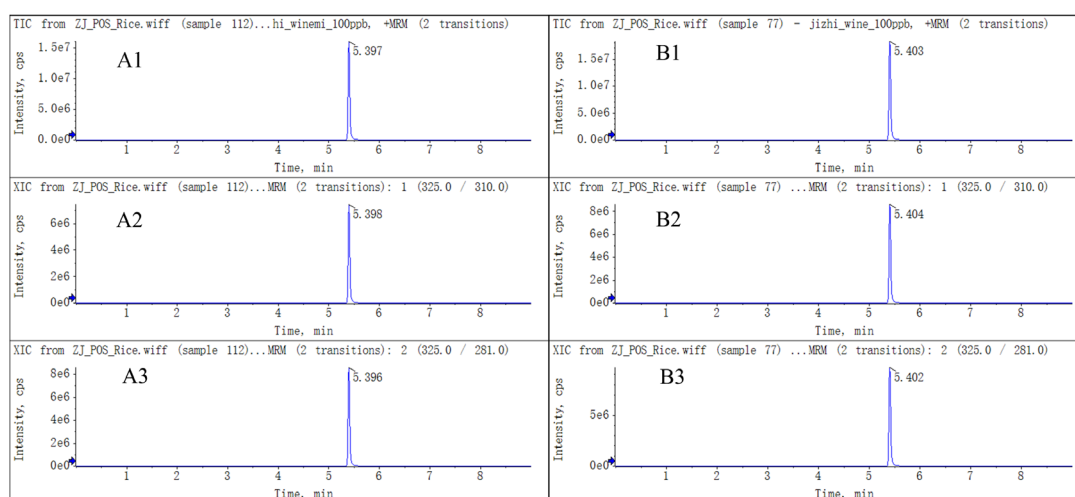

**Figure S1.** TIC of STG in fermented rice (A1) and wine (B1); product ion chromatograms of STG in fermented rice (A2, A3) and wine (B2, B3).

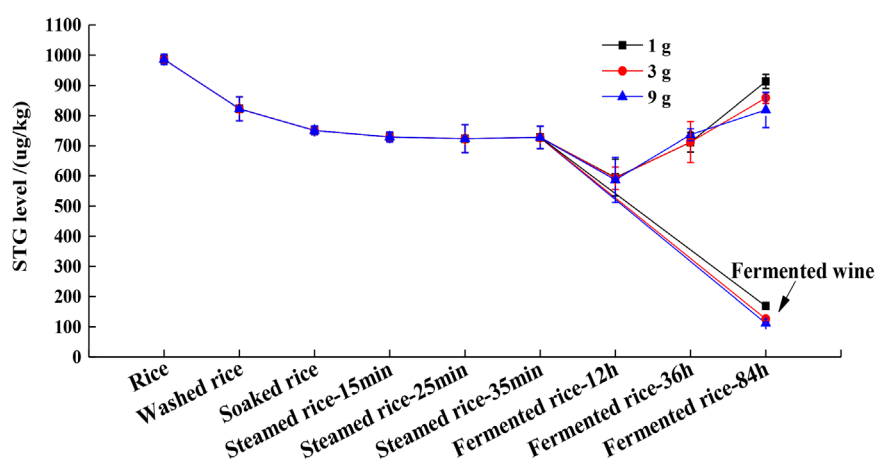

**Figure S2.** Changes of STG level in fermented rice during rice wine production.

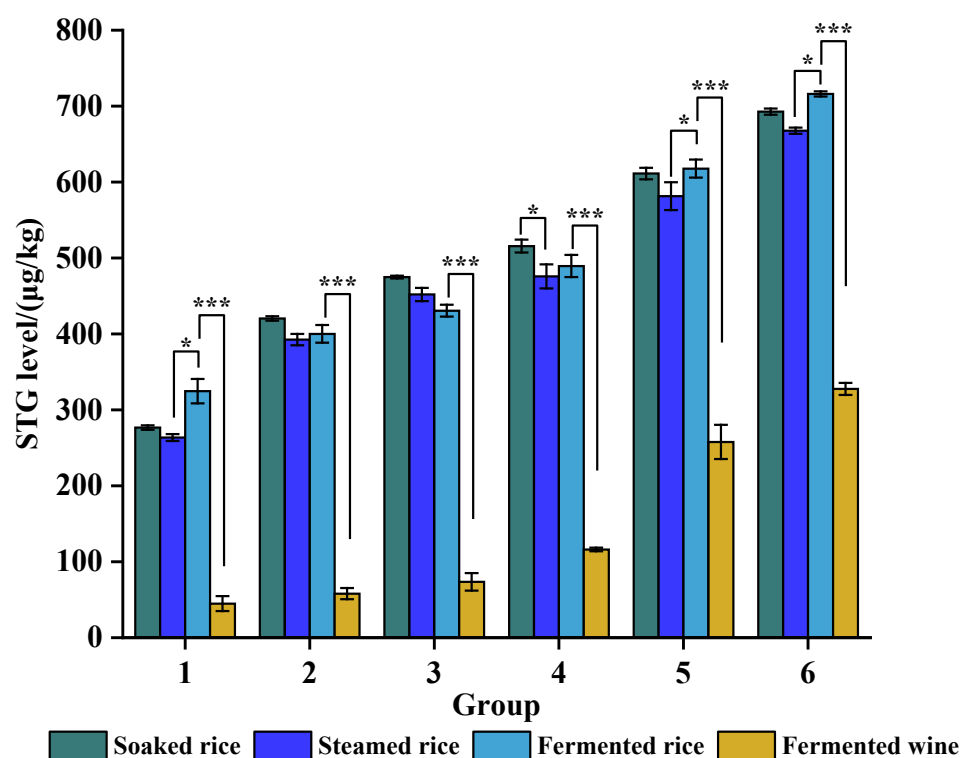

**Figure S3.** Changes of STG level in spiked samples during the rice wine process. Note: Group 1–6, spiking STG levels of 276.7, 420.3, 474.9, 515.7, 611.2, 692.7 µg/kg, respectively (Table S4). Data are expressed as means ± standard error of means (n = 3). Error bars represent the standard deviation. \* Indicates a significant difference of STG in rice wine product of the step versus the prior step (\* $p < 0.05$ , \*\*\* $p < 0.001$ ), as determined by Student's t-test.

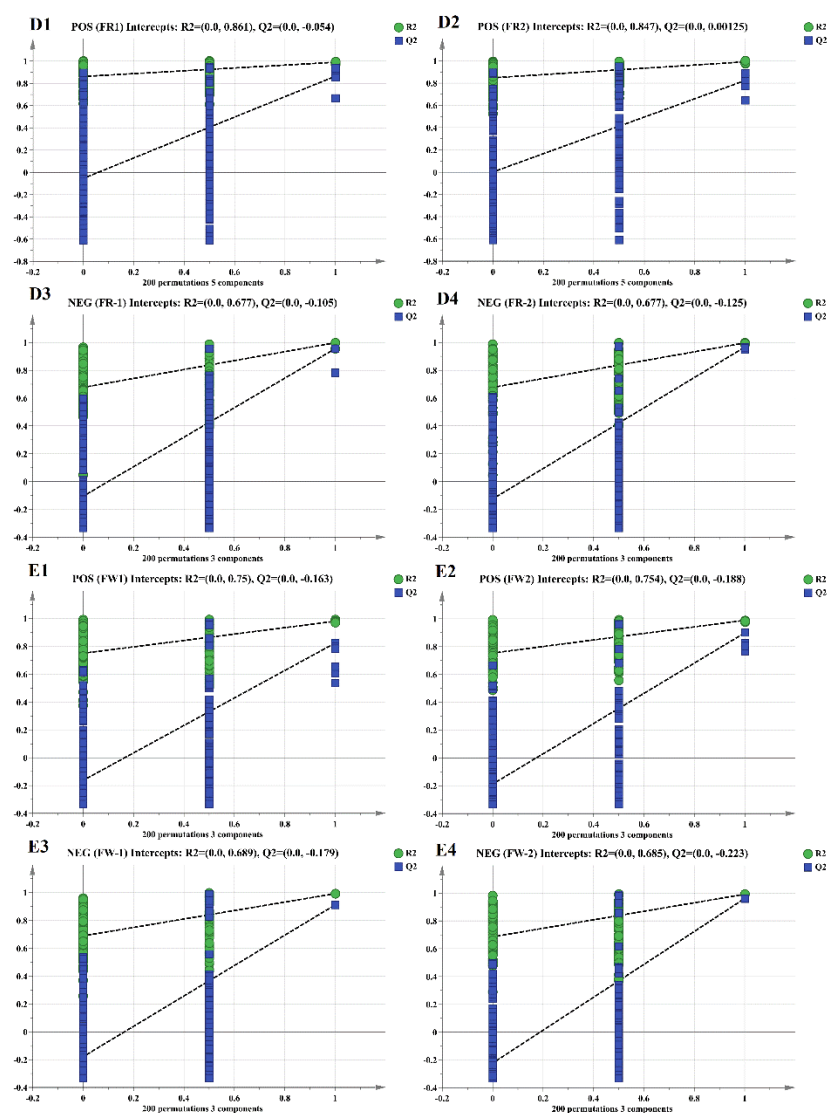

**Figure S4.** Permutation test on fermented rice (FR) and fermented wine (FW) of exposure groups to control group on PLS-DA model. Spectra are randomly assigned to a class by 200 permutations. (D1, D3, E1, E3) Low level treatment; (D2, D4, E2, E4) High level treatment.

**Table S1.** Chromatography gradient elution procedure and mass parameters for STG analysis by LC-MS/MS.

| Mobile Phase     | A: water (0.1% formic acid, 2mM ammonium formate) |       |       |                                |
|------------------|---------------------------------------------------|-------|-------|--------------------------------|
|                  | B: acetonitrile                                   |       |       |                                |
| Gradient Profile | Time/min                                          | A (%) | B (%) | Flow rate/mL·min <sup>-1</sup> |
|                  | 0                                                 | 55    | 45    | 0.3                            |
|                  | 1                                                 | 55    | 45    | 0.3                            |
|                  | 10                                                | 10    | 90    | 0.3                            |
|                  | 10.1                                              | 55    | 45    | 0.3                            |
|                  | 11.5                                              | 55    | 45    | 0.3                            |
| Mass Parameters  | Curtain gas: 35 psi                               |       |       |                                |
|                  | Ion source gas 1 and gas 2: 60 psi                |       |       |                                |
|                  | Source Temperature: 550 °C                        |       |       |                                |
|                  | Ionspray voltage: 5.5 kV                          |       |       |                                |

**Table S2.** Instrumental and chromatographic conditions for the analysis of metabolomics in rice wine samples.

| Mobile Phase     | Positive mode                                                        |       |       |                                |
|------------------|----------------------------------------------------------------------|-------|-------|--------------------------------|
|                  | A: water (0.1% formic acid)<br>B: acetonitrile                       |       |       |                                |
|                  | Negative mode                                                        |       |       |                                |
|                  | A: water (0.1% formic acid+2 mM ammonium acetate)<br>B: acetonitrile |       |       |                                |
|                  | Time/min                                                             | A (%) | B (%) | Flow rate/mL·min <sup>-1</sup> |
| Gradient Profile | 0                                                                    | 95    | 5     | 0.35                           |
|                  | 1.5                                                                  | 95    | 5     | 0.35                           |
|                  | 15                                                                   | 0     | 100   | 0.35                           |
|                  | 17                                                                   | 0     | 100   | 0.35                           |
|                  | 17.1                                                                 | 95    | 5     | 0.35                           |
|                  | 22                                                                   | 95    | 5     | 0.35                           |
| Mass Parameters  | Scan range (m/z) = 70 to 1050                                        |       |       |                                |
|                  | Collision energy (eV) = 20, 40, 60                                   |       |       |                                |
|                  | Capillary temperature (°C) = 320                                     |       |       |                                |

**Table S3.** Changes of STG absolute content (µg) in each procedure during rice wine production (mean ± SD, n = 3).

| Sample       | Rice  | Washed rice | Soaked rice | Steam rice         |                    |                    | Rice wine-1g       | Rice wine-3g       | Rice wine-9g       |
|--------------|-------|-------------|-------------|--------------------|--------------------|--------------------|--------------------|--------------------|--------------------|
|              |       |             |             | 15min              | 25min              | 35min              |                    |                    |                    |
| Content/(µg) | 591.7 | 542.7*      | 533.1       | 524.5 <sup>a</sup> | 520.6 <sup>a</sup> | 523.8 <sup>a</sup> | 494.8 <sup>b</sup> | 467.2 <sup>b</sup> | 328.7 <sup>a</sup> |
| SD           | 10.9  | 26.5        | 9.6         | 11.4               | 32.1               | 24.4               | 14.3               | 35.0               | 15.6               |

Note: \* Indicates a significant difference of STG in rice wine product of the step versus the prior step ( $p < 0.05$ ). The different letters show a remarkable difference ( $p < 0.05$ ) between the effects of the different factors in same processing; conversely, the same letter shows no significant difference observed, as determined by Student's t-test. Rice wine-1g: the 1g level of rice leaven during rice wine production, all else follows.

**Table S4.** Changes of STG level in spiked samples during rice wine production (mean ± SD, n = 3).

| No. | Concentration |               |                |                 |
|-----|---------------|---------------|----------------|-----------------|
|     | Soaked rice   | Steamed rice  | Fermented rice | Fermented wine  |
| 1   | 276.7 ± 2.9   | 263.6 ± 4.6   | 324.7* ± 16.0  | 44.9*** ± 9.8   |
| 2   | 420.3 ± 2.9   | 392.6 ± 7.5   | 400.1 ± 11.7   | 58.0*** ± 7.3   |
| 3   | 474.9 ± 1.9   | 452.0 ± 8.7   | 430.6 ± 7.8    | 73.5*** ± 11.5  |
| 4   | 515.7 ± 8.5   | 475.8 ± 15.9* | 489.4 ± 14.6   | 116.1*** ± 2.4  |
| 5   | 611.2 ± 7.5   | 581.5 ± 18.3  | 617.7* ± 11.9  | 257.8*** ± 22.5 |
| 6   | 692.7 ± 4.1   | 667.7 ± 4.1   | 716.1* ± 3.4   | 327.6*** ± 7.9  |

\* Indicates a significant difference of STG in rice wine product of the step versus the prior step (\* $p < 0.05$ , \*\*\* $p < 0.001$ ), as determined by Student's t-test.

Note: Soaked rice samples 1–6, total 6 STG spiking levels (µg/kg).

**Table S5.** Differential metabolites of rice wine by untargeted metabolomics ( $p < 0.05$  and  $VIP > 1$ ).

| No. | HMDB ID     | Compound name                         | Formula     | VIP value | P value               |
|-----|-------------|---------------------------------------|-------------|-----------|-----------------------|
| 1   | HMDB0004705 | 12(13)-DiHOME                         | C18H34O4    | 1.063     | $5.69 \times 10^{-4}$ |
| 2   | HMDB0006218 | (9cis)-Retinal                        | C20H28O     | 1.477     | $1.02 \times 10^{-3}$ |
| 3   | HMDB0005048 | 10(E), 12(Z)-Conjugated linoleic acid | C18H32O2    | 1.124     | $1.66 \times 10^{-4}$ |
| 4   | HMDB0032090 | 12-oxo Phytodienoic Acid              | C18H28O3    | 1.149     | $3.78 \times 10^{-5}$ |
| 5   | HMDB0006294 | 16-Hydroxyhexadecanoic acid           | C16H32O3    | 1.695     | $1.22 \times 10^{-4}$ |
| 6   | HMDB0011568 | 1-Linoleoyl glycerol                  | C21H38O4    | 1.434     | $7.40 \times 10^{-5}$ |
| 7   | HMDB0011564 | 1-Palmitoylglycerol                   | C19H38O4    | 1.021     | $2.92 \times 10^{-5}$ |
| 8   | HMDB0011131 | 1-Stearoylglycerol                    | C21H42O4    | 1.000     | $2.11 \times 10^{-2}$ |
| 9   | HMDB0059709 | 2-Hydroxybenzyl alcohol               | C7H8O2      | 2.268     | $5.54 \times 10^{-5}$ |
| 10  | HMDB01624   | 2-Hydroxycaproic acid                 | C6H12O3     | 1.780     | $6.15 \times 10^{-6}$ |
| 11  | HMDB0003540 | 3'-Adenosine monophosphate (3'-AMP)   | C10H14N5O7P | 1.206     | $2.95 \times 10^{-2}$ |
| 12  | HMDB0000779 | 3-Phenyllactic acid                   | C9H10O3     | 1.573     | $3.78 \times 10^{-6}$ |
| 13  | HMDB0001173 | 5'-S-Methyl-5'-thioadenosine          | C11H15N5O3S | 1.146     | $2.72 \times 10^{-2}$ |
| 14  | HMDB0012273 | Adenine                               | C5H5N5      | 1.289     | $2.36 \times 10^{-3}$ |
| 15  | HMDB0000045 | Adenosine 5'-monophosphate            | C10H14N5O7P | 1.221     | $5.29 \times 10^{-3}$ |
| 16  | HMDB0028699 | Alanyltyrosine                        | C12H16N2O4  | 1.301     | $3.06 \times 10^{-4}$ |
| 17  | HMDB0001043 | Arachidonic acid                      | C20H32O2    | 1.307     | $4.10 \times 10^{-5}$ |
| 18  | HMDB0000168 | L-Asparagine                          | C4H8N2O3    | 1.050     | $1.12 \times 10^{-3}$ |
| 19  | HMDB0001870 | Benzoic acid                          | C7H6O2      | 1.011     | $1.07 \times 10^{-3}$ |
| 20  | HMDB0000097 | Choline                               | C5H14NO     | 1.075     | $3.35 \times 10^{-3}$ |
| 21  | HMDB0000641 | L-Glutamine                           | C5H10N2O3   | 1.203     | $1.17 \times 10^{-2}$ |
| 22  | HMDB0000163 | Maltose                               | C12H22O11   | 1.209     | $2.79 \times 10^{-5}$ |
| 23  | HMDB0000651 | Decanoylcarnitine                     | C17H33NO4   | 1.042     | $1.61 \times 10^{-3}$ |
| 24  | HMDB0000929 | L-Tryptophan                          | C11H12N2O2  | 1.124     | $3.94 \times 10^{-2}$ |
| 25  | HMDB0003213 | Raffinose                             | C18H32O16   | 1.177     | $7.03 \times 10^{-3}$ |
| 26  | HMDB0000606 | D- $\alpha$ -Hydroxyglutaric acid     | C5H8O5      | 1.400     | $2.11 \times 10^{-3}$ |
| 27  | HMDB0001999 | Eicosapentaenoic acid                 | C20H30O2    | 1.748     | $9.72 \times 10^{-7}$ |
| 28  | HMDB0000573 | Elaidic acid                          | C18H34O2    | 1.397     | $1.06 \times 10^{-4}$ |
| 29  | HMDB0034153 | Ethyl myristate                       | C16H32O2    | 1.223     | $1.78 \times 10^{-4}$ |
| 30  | HMDB0004472 | Eucalyptol                            | C10H18O     | 1.343     | $2.27 \times 10^{-3}$ |
| 31  | HMDB0000625 | Gluconic acid                         | C6H12O7     | 1.729     | $3.04 \times 10^{-2}$ |
| 32  | HMDB0000132 | Guanine                               | C5H5N5O     | 1.405     | $1.23 \times 10^{-3}$ |
| 33  | HMDB0001397 | Guanosine monophosphate (GMP)         | C10H14N5O8P | 1.126     | $2.61 \times 10^{-2}$ |
| 34  | HMDB0000130 | Homogentisic acid                     | C8H8O4      | 1.897     | $1.33 \times 10^{-2}$ |
| 35  | HMDB0014613 | Isoferulic acid                       | C10H10O4    | 1.225     | $4.59 \times 10^{-5}$ |
| 36  | HMDB0000191 | Aspartic acid                         | C4H7NO4     | 1.462     | $5.38 \times 10^{-4}$ |
| 37  | HMDB0011175 | Leucylproline                         | C11H20N2O3  | 1.072     | $4.68 \times 10^{-3}$ |
| 38  | HMDB0000125 | Glutathione (reduced)                 | C10H17N3O6S | 1.518     | $1.85 \times 10^{-4}$ |
| 39  | HMDB0000943 | Threonic acid                         | C4H8O5      | 2.710     | $4.05 \times 10^{-7}$ |
| 40  | HMDB0000167 | L-Threonine                           | C4H9NO3     | 1.007     | $3.92 \times 10^{-2}$ |
| 41  | HMDB0000691 | Malonic acid                          | C3H4O4      | 1.694     | $2.17 \times 10^{-5}$ |
| 42  | HMDB0000512 | N-Acetyl-L-phenylalanine              | C11H13NO3   | 1.170     | $8.96 \times 10^{-5}$ |
| 43  | HMDB0001488 | Nicotinic acid                        | C6H5NO2     | 1.742     | $2.17 \times 10^{-5}$ |
| 44  | HMDB0002117 | Oleamide                              | C18H35NO    | 1.646     | $1.49 \times 10^{-5}$ |
| 45  | HMDB0002364 | Oleonic acid                          | C30H48O3    | 1.748     | $9.12 \times 10^{-5}$ |
| 46  | HMDB0003229 | Palmitoleic acid                      | C16H30O2    | 1.204     | $2.34 \times 10^{-4}$ |
| 47  | HMDB0003689 | Protectin D1                          | C22H32O4    | 1.405     | $3.99 \times 10^{-4}$ |
| 48  | HMDB0000252 | Sphingosine (d18:1)                   | C18H37NO2   | 1.062     | $5.93 \times 10^{-3}$ |
| 49  | HMDB0000300 | Uracil                                | C4H4N2O2    | 1.102     | $6.54 \times 10^{-3}$ |
| 50  | HMDB0000288 | Uridine monophosphate (UMP)           | C9H13N2O9P  | 1.028     | $2.62 \times 10^{-2}$ |

|    |             |                                   |           |       |                       |
|----|-------------|-----------------------------------|-----------|-------|-----------------------|
| 51 | HMDB0032012 | Vanillyl alcohol                  | C8H10O3   | 1.853 | $4.67 \times 10^{-2}$ |
| 52 | HMDB0000292 | Xanthine                          | C5H4N4O2  | 1.101 | $6.40 \times 10^{-4}$ |
| 53 | HMDB0030963 | $\alpha$ -Eleostearic acid        | C18H30O2  | 1.030 | $5.72 \times 10^{-4}$ |
| 54 | HMDB0013624 | $\alpha$ -Linolenoyl ethanolamide | C20H35NO2 | 1.355 | $1.41 \times 10^{-5}$ |

---
